# Supplementary material for: Harnessing liquid-in-liquid printing and micropatterned substrates to fabricate 3-dimensional all-liquid fluidic devices
Source: PubMed Central journal article supplement (PMC6403306; doi:10.1038/s41467-019-09042-y), 2019-03-06
Supplement: 41467_2019_9042_MOESM3_ESM.pdf [file 41467_2019_9042_MOESM3_ESM.pdf]

## **Description of Additional Supplementary Files**

### **Supplementary Movie 1**

**Description:** Wrinkling of the pendant drop during injection of a nanoclay dispersion into and subsequent withdrawal from toluene containing surfactant at a rate of  $0.2 \text{ mL min}^{-1}$ , showcasing rapid NPS interfacial assembly.

### **Supplementary Movie 2**

**Description:** Pumping aqueous dye at a flow rate of  $10 \text{ mL h}^{-1}$  through micropatterned liquid-in-liquid channels, with or without the NPS wall present.

### **Supplementary Movie 3**

**Description:** Mass transfer across the NPS wall while pumping aqueous dye through the micropatterned liquid-in-liquid channel.

### **Supplementary Movie 4**

**Description:** Continuous-flow liquid-in-liquid microreactor-on-a-chip for in-line catalyzed chemical transformations.
